# Supplementary material for: The relationship between single nucleotide polymorphisms and skin cancer susceptibility: A systematic review and network meta-analysis
Source: Frontiers journal article supplement (doi:10.3389/fonc.2023.1094309), 2023-02-15

**Figure 2. The percentage of direct and indirect evidence in the subgroup two of the allele model**

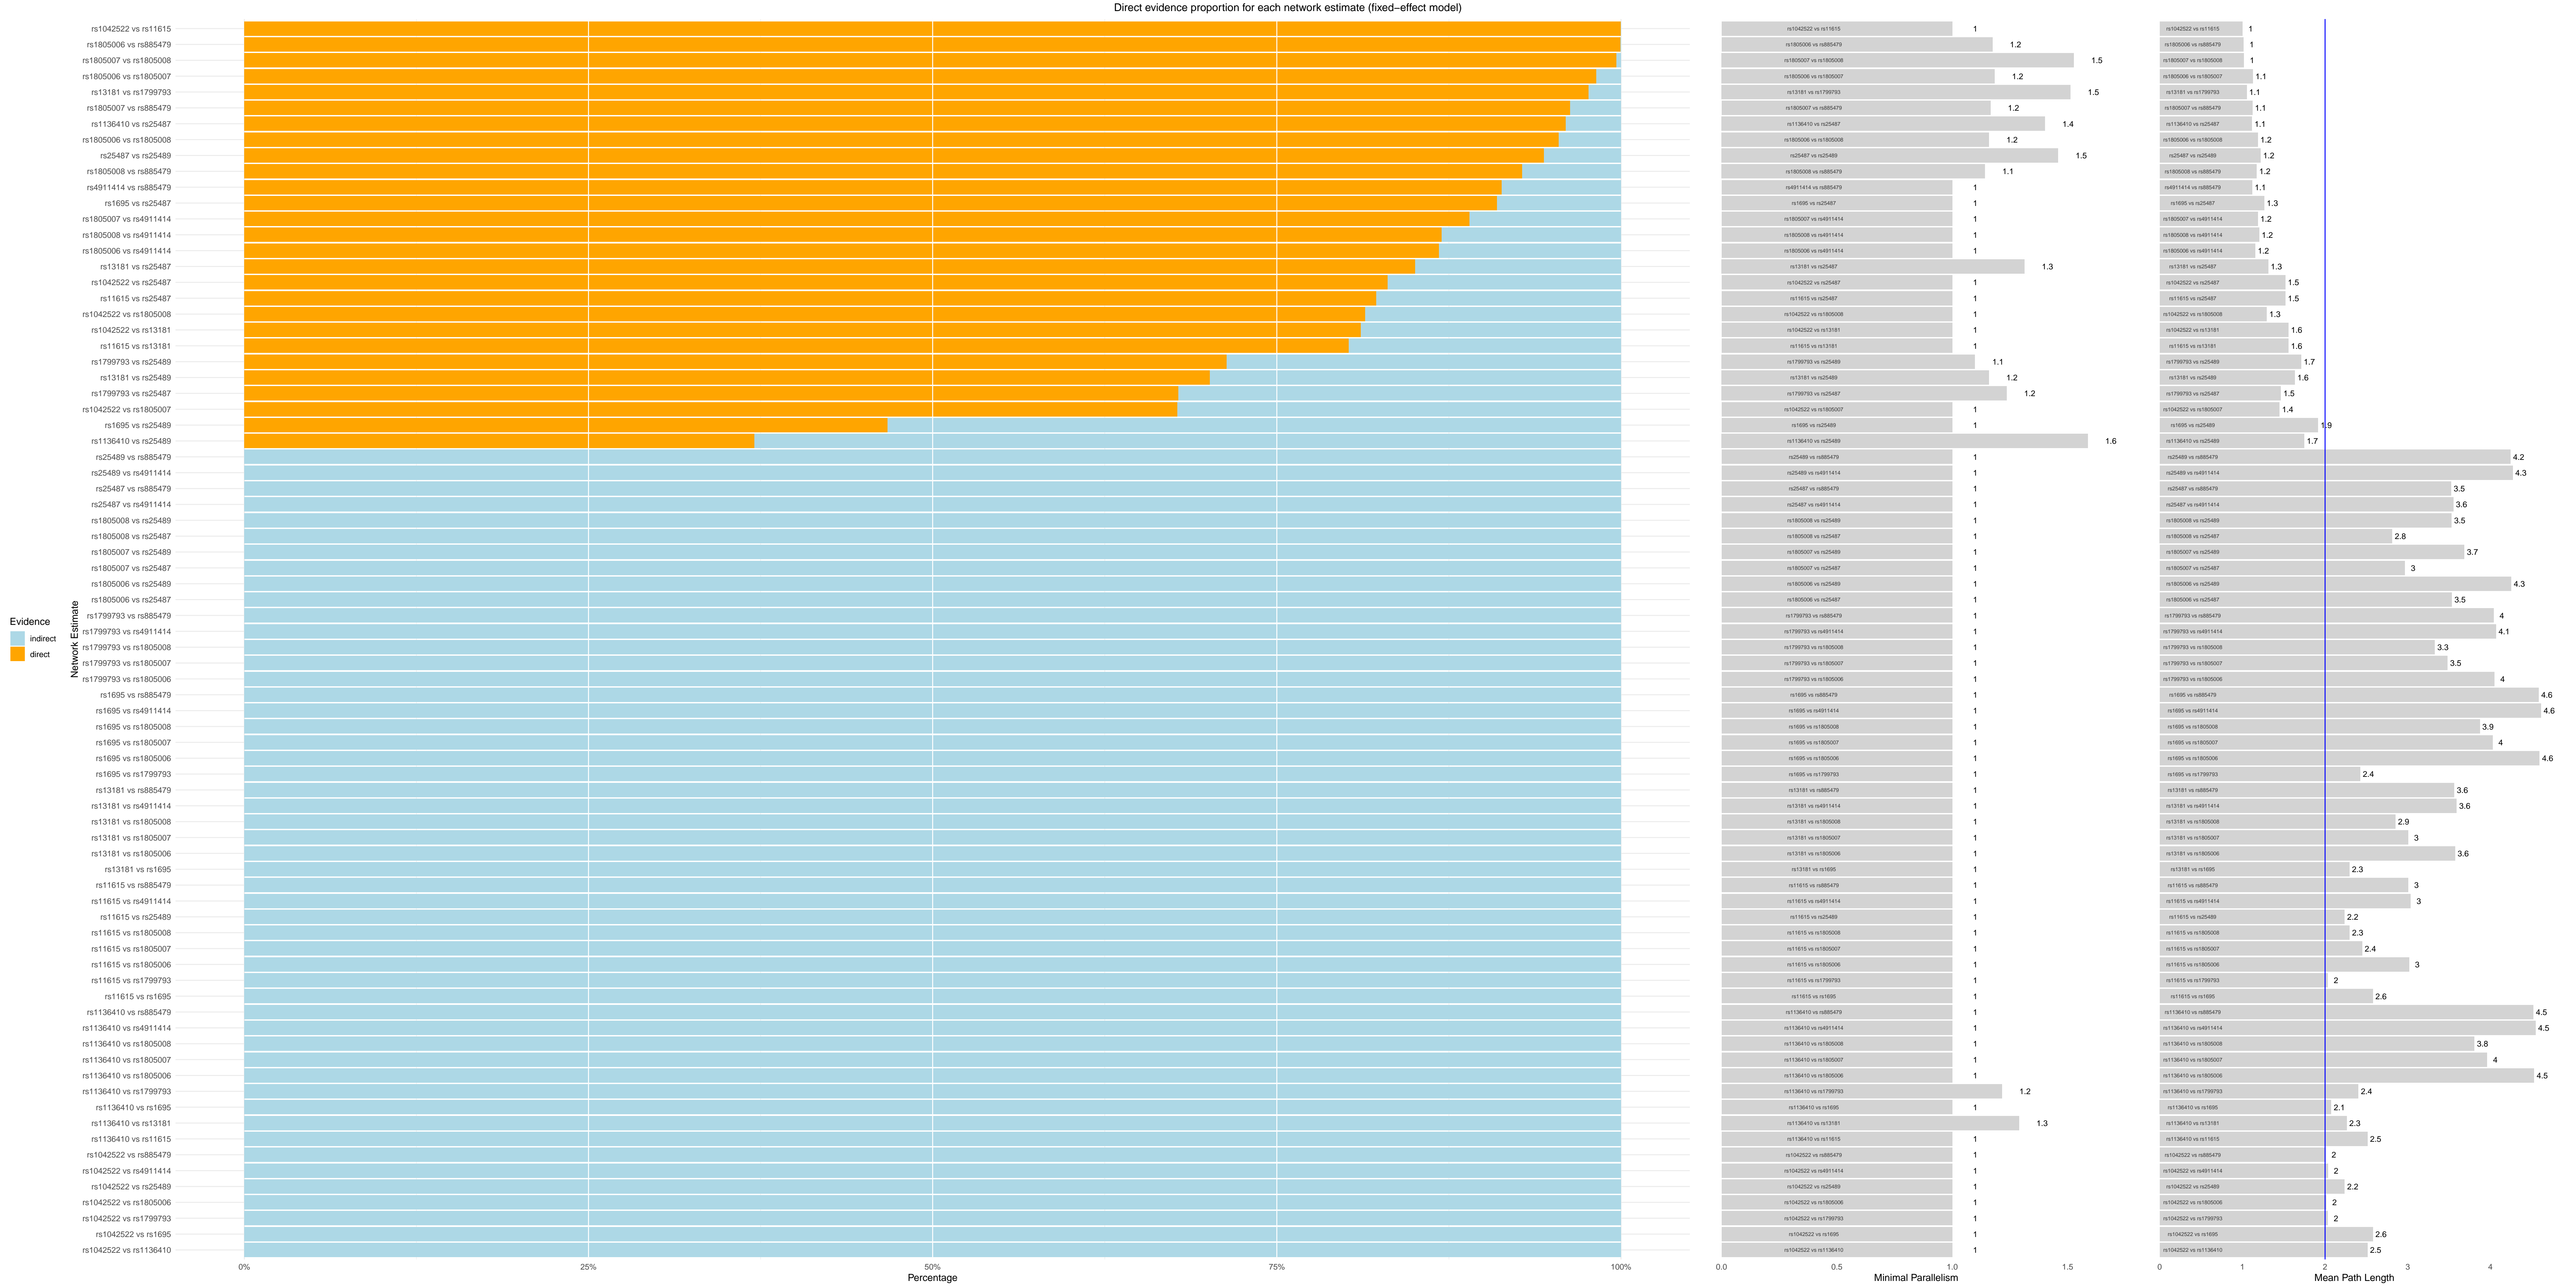

Supplement: Image_2.pdf [file Image_2.pdf]
